# Supplementary material for: Alkyne–azide coupling of tailored poly(vinylidene fluoride) and polystyrene for the synthesis of block copolymers
Source: Royal Society of Chemistry journal article supplement (doi:10.1039/c1py00427a), 2011-12-02
Supplement: c1py00427a.pdf [file c1py00427a.pdf]

## SUPPORTING INFORMATION

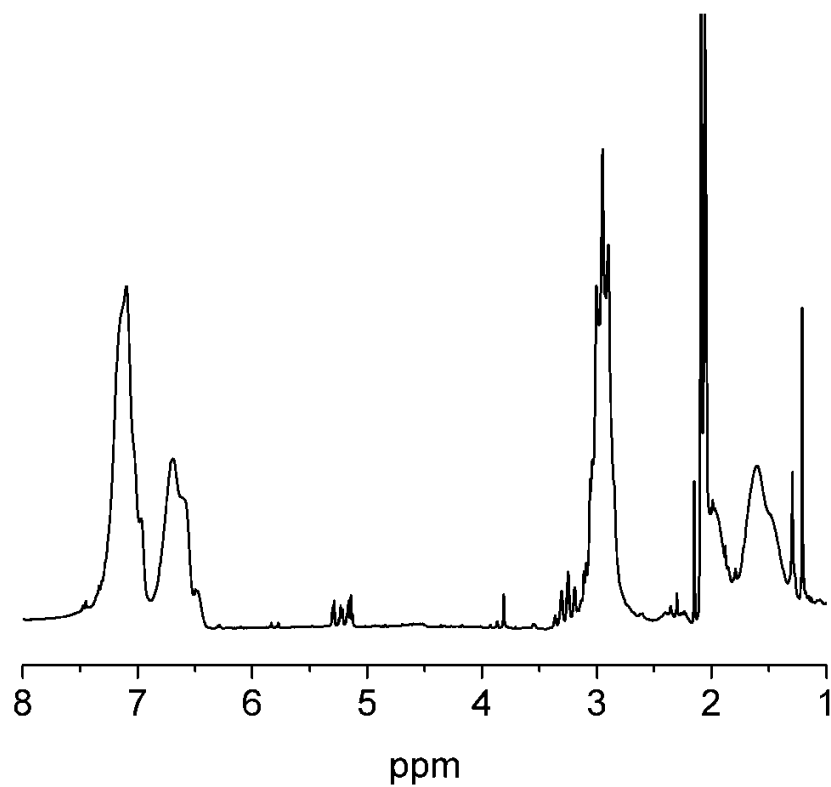

**Figure S1.** <sup>1</sup>H-NMR spectrum of the PVDF-*b*-PS copolymer obtained from the reaction of azide-terminated PVDF with  $M_n = 2200 \text{ g}\cdot\text{mol}^{-1}$  and alkyne-terminated PS with  $M_n = 3500 \text{ g}\cdot\text{mol}^{-1}$ .
